# Supplementary material for: Neoadjuvant pazopanib and molecular analysis of tissue response in renal cell carcinoma
Source: JCI journal article supplement (doi:10.1172/jci.insight.132852), 2020-11-18
Supplement: sd3 [file 3]

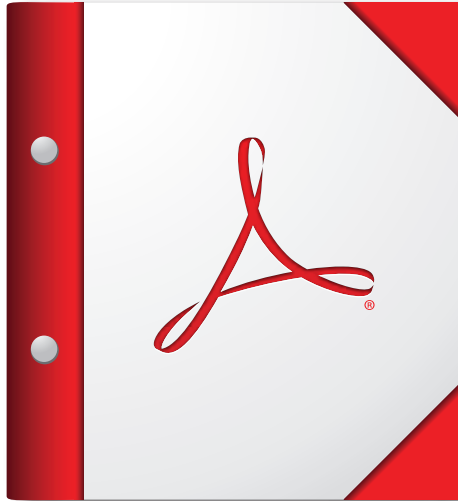

**For the best experience, open this PDF portfolio in  
Acrobat X or Adobe Reader X, or later.**

**Get Adobe Reader Now!**
